# Supplementary material
Source: MDPI journal article supplement (https://www.mdpi.com/search?q=microorganisms-08-01619)
Supplement: s001 [file microorganisms-08-01619-s001.pdf]

Supplementary material

# Salt Marsh Elevation Drives Root Microbial Composition of the Native Invasive Grass *Elytrigia atherica*

Edisa García Hernández <sup>1,\*</sup>, Elena Baraza <sup>2</sup>, Christian Smit <sup>3</sup>, Matty P. Berg <sup>3,4</sup> and Joana Falcão Salles <sup>1,\*</sup>

<sup>1</sup> Microbial Community Ecology, Groningen Institute for Evolutionary Life Sciences, University of Groningen, 9747 AG Groningen, The Netherlands

<sup>2</sup> Departamento de Biología, Universitat de les Illes Balears-INAGEA, 07122 Mallorca, Spain; elena.baraza@uib.es

<sup>3</sup> Community and Conservation Ecology Group, Groningen Institute for Evolutionary Life Sciences, University of Groningen, 9747 AG Groningen, The Netherlands; c.smit@rug.nl (C.S.); m.p.berg@vu.nl (M.P.B.)

<sup>4</sup> Department of Ecological Science, Section Animal Ecology, Vrije Universiteit Amsterdam, 1081 HV Amsterdam, The Netherlands

\* Correspondence: d.e.garcia-hernandez@rug.nl (E.G.H.); j.falcao.salles@rug.nl (J.F.S.);  
Tel.: +31-50-3632236 (E.G.H.); +31-50-36-32162 (J.F.S.)

**S1.** Map showing the geographic location of the sampling sites in the Dutch barrier island of Schiermonnikoog. Sites at High elevation are H1-3 and sites at low elevation L1-L3.

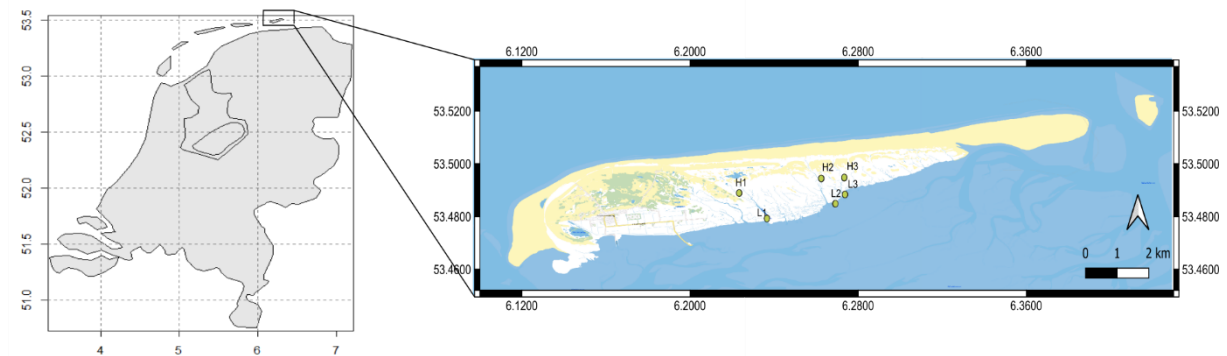

**S2.** Data of the plant traits, intensity of mycorrhizal colonization and plant litter biomass from each of the sampling sites. Sites H1-H3 are located at salt marsh high elevation and L1-L3 at low elevation.

| <b>Site</b> | <b>Reproductive height (cm)</b> | <b>Specific Leaf Area (cm<sup>2</sup> of leaves g<sup>-1</sup> dry mass)</b> | <b>Aboveground biomass (g)</b> | <b>Plant litter dry biomass</b> | <b>Intensity of mycorrhizal colonization (%)</b> |
|-------------|---------------------------------|------------------------------------------------------------------------------|--------------------------------|---------------------------------|--------------------------------------------------|
| H1_A        | 85.35                           | 100.6                                                                        | 39.35                          | 50.71                           | 9.33                                             |
| H1_B        | 89.50                           | 92.88                                                                        | 39.61                          | 25.16                           | 14.44                                            |
| H1_C        | 89.10                           | 97.55                                                                        | 29.4                           | 43.94                           | 33.33                                            |
| L1_A        | 83.15                           | 115.5                                                                        | 41.8                           | 0.65                            | 10                                               |
| L1_B        | 83.15                           | 142.34                                                                       | 49.59                          | 0.68                            | 5                                                |
| L1_C        | 76.00                           | 140.3                                                                        | 30.94                          | 2.94                            | 20.93                                            |
| H2_A        | 70.55                           | 85.34                                                                        | 17.18                          | 17.85                           | 27                                               |
| H2_B        | 73.70                           | 102.03                                                                       | 26.02                          | 17.48                           | 69.33                                            |
| H2_C        | 72.05                           | 98.24                                                                        | 10.07                          | 15.91                           | 20                                               |
| L2_A        | 81.30                           | 115.3                                                                        | 41.95                          | 5.78                            | 10                                               |
| L2_B        | 90.80                           | 100.63                                                                       | 40.1                           | 9.05                            | 4                                                |
| L2_C        | 79.00                           | 122.84                                                                       | 15.55                          | 3.26                            | 12                                               |
| H3_A        | 74.70                           | 109.05                                                                       | 37.87                          | 19.17                           | 38                                               |
| H3_B        | 77.95                           | 95.59                                                                        | 21.48                          | 12.5                            | 66                                               |
| H3_C        | 82.55                           | 96.95                                                                        | 25.51                          | 12.69                           | 42.22                                            |
| L3_A        | 77.62                           | 117.81                                                                       | 20.67                          | 2.2                             | 5.45                                             |
| L3_B        | 71.75                           | 121.41                                                                       | 31.79                          | 4.08                            | 0                                                |
| L3_C        | 81.30                           | 113.51                                                                       | 32.86                          | 2.74                            | 4                                                |

### S3. Soil physicochemical parameters methods

The soil physicochemical parameters tested were texture, pH, soil water content (SWC), organic matter (OM), sodium (Na), nitrates ( $\text{N-NO}_3^-$ ) and ammonium ( $\text{N-NH}_4^+$ ), total carbon and nitrogen (TC/TN). The soil parameters were carried out in collaboration with the Department of Community and Conservation Ecology in the University of Groningen, except for texture that was performed in the Netherlands Institute of Ecology (NIOO-KNAW). Soil texture determined the grain size distribution by laser diffraction on a particle sizer (Malvern, Worchester, UK). The pH was measured weighting 15 g and adding 20 ml of distilled water. The tubes were shaken and left stand overnight, then the pH was measured using a potentiometer. Soil moisture was measured by oven-drying 10 g of soil at  $105^\circ\text{C}$  for ~16 h. Moisture percentage was calculated as fresh weight minus dry weight, divided by fresh weight multiplied by 100. After that, the dried samples were placed in a muffle furnace (Naberthermn, Germany) at  $550^\circ\text{C}$  for 4 h. The soil organic matter content was calculated as dry soil weight – dry weigh after ignition, divided by dry soil weight x 100 [1]. To measure N content in nitrate and ammonium, 12.5 g soil was mixed with 30 ml KCl (1M), shaken for ~16 h using a custom-made overhead shaker (1 turn/s). Afterwards, the suspension was filtered with a paper filter by gravity and the extract was analyzed for  $\text{N-NO}_3^-$  and  $\text{N-NH}_4^+$  on a continuous flow auto analyzer (Type 5100; Skalar-40 BV, Breda, the Netherlands) using a colorimetric method [2]. For TC, TN and Na content, 10 g soil was first dried at  $40^\circ\text{C}$  in a stove for 16 h and then ground to a fine powder in a Cyclotec 1093 mill. Sodium exchangeable ion content was measured by extraction of 5 g soil with ammonium acetate (1M, pH 7), mixed in the overhead shaker for 1 h and then filtered with a paper filter by gravity. The filtrate was analyzed on an atomic absorption spectrometer (AAS) (Varian Spectra AA 220FS, Australia). For TN and TC measurements, the soils were analyzed on a combustion elemental analyzer (CE Instruments EA 1110).

**S4.** Soil physicochemical parameters in each sampling site. TC; Total Soil Carbon percent, TN; total Nitrogen percent.

| Site | Soil Organic Matter (%) | Soil water content (%) | Soil nitrates (mg·N-NO <sub>3</sub> <sup>-</sup> ·g <sup>-1</sup> dry soil) | Soil Ammonium (mg·N-NH <sub>4</sub> <sup>+</sup> ·g <sup>-1</sup> dry soil) | pH    | Sodium (mg Na <sup>+</sup> /100 g dry soil) | Sand (%) | TC (%) | TN (%) | Soil carbon/nitrogen ratio |
|------|-------------------------|------------------------|-----------------------------------------------------------------------------|-----------------------------------------------------------------------------|-------|---------------------------------------------|----------|--------|--------|----------------------------|
| H1_A | 11.71                   | 28.56                  | 23.15                                                                       | 5.44                                                                        | 8.05  | 249.41                                      | 29.33    | 4.809  | 0.408  | 11.8                       |
| H1_B | 12.19                   | 27.94                  | 22.07                                                                       | 7.56                                                                        | 8.025 | 185.7                                       | 37.94    | 4.772  | 0.4    | 11.9                       |
| H1_C | 10.94                   | 28.69                  | 13.31                                                                       | 6.41                                                                        | 8.26  | 194.9                                       | 35.17    | 4.937  | 0.43   | 11.5                       |
| L1_A | 16                      | 41.29                  | 15.48                                                                       | 4.73                                                                        | 7.545 | 731.52                                      | 12.42    | 5.957  | 0.502  | 11.9                       |
| L1_B | 16.39                   | 41.47                  | 37.85                                                                       | 1.86                                                                        | 7.61  | 753.9                                       | 13.69    | 5.77   | 0.485  | 11.9                       |
| L1_C | 16.03                   | 43.34                  | 14.08                                                                       | 4.64                                                                        | 7.58  | 764.23                                      | 13.41    | 6.175  | 0.5    | 12.4                       |
| H2_A | 4.16                    | 14.58                  | 3.68                                                                        | 10.21                                                                       | 8.81  | 39.75                                       | 84.43    | 5.323  | 0.457  | 11.7                       |
| H2_B | 3.87                    | 12.45                  | 3.15                                                                        | 7.62                                                                        | 8.84  | 32.6                                        | 82.16    | 1.593  | 0.119  | 13.4                       |
| H2_C | 3.96                    | 12.54                  | 5.57                                                                        | 9.03                                                                        | 8.72  | 30.26                                       | 78.64    | 1.639  | 0.131  | 12.5                       |
| L2_A | 14.82                   | 43.95                  | 20.93                                                                       | 3.48                                                                        | 7.53  | 769.94                                      | 15.38    | 5.243  | 0.396  | 13.3                       |
| L2_B | 13.5                    | 40.97                  | 40.41                                                                       | 7.49                                                                        | 7.58  | 656.58                                      | 22.35    | 4.788  | 0.373  | 12.9                       |
| L2_C | 14.99                   | 43.66                  | 58.32                                                                       | 6.12                                                                        | 7.51  | 793.22                                      | 15.39    | 5.465  | 0.426  | 12.8                       |
| H3_A | 2.96                    | 9.92                   | 3.21                                                                        | 10.89                                                                       | 8.42  | 15.21                                       | 87.88    | 1.424  | 0.114  | 12.5                       |
| H3_B | 4.29                    | 11.76                  | 5.11                                                                        | 10.75                                                                       | 8.77  | 34.87                                       | 80.69    | 2.074  | 0.16   | 13                         |
| H3_C | 3.75                    | 10.35                  | 3.77                                                                        | 10.73                                                                       | 8.65  | 22.24                                       | 83.86    | 1.287  | 0.097  | 13.2                       |
| L3_A | 16.25                   | 47.74                  | 19.99                                                                       | 7.74                                                                        | 7.43  | 925.47                                      | 12.65    | 5.662  | 0.456  | 12.4                       |
| L3_B | 14.6                    | 41.52                  | 23.47                                                                       | 6.6                                                                         | 7.59  | 738.22                                      | 14.45    | 5.107  | 0.382  | 13.4                       |
| L3_C | 14.08                   | 39.6                   | 22.88                                                                       | 5.95                                                                        | 7.56  | 636.3                                       | 13.83    | 5.208  | 0.378  | 13.8                       |

**S5.** Bacterial Amplicon Sequence Variants (ASVs) richness comparing type of communities (A) and in each community separately: bulk soil (B), rhizosphere (C) and endosphere (D) in each sampling site. Sites H1-H3 are located at salt marsh high elevation and L1-L3 at low elevation. Letters denotes significant differences after a pairwise comparison of the least square means ( $p < 0.001$ , Tukey adjustment).

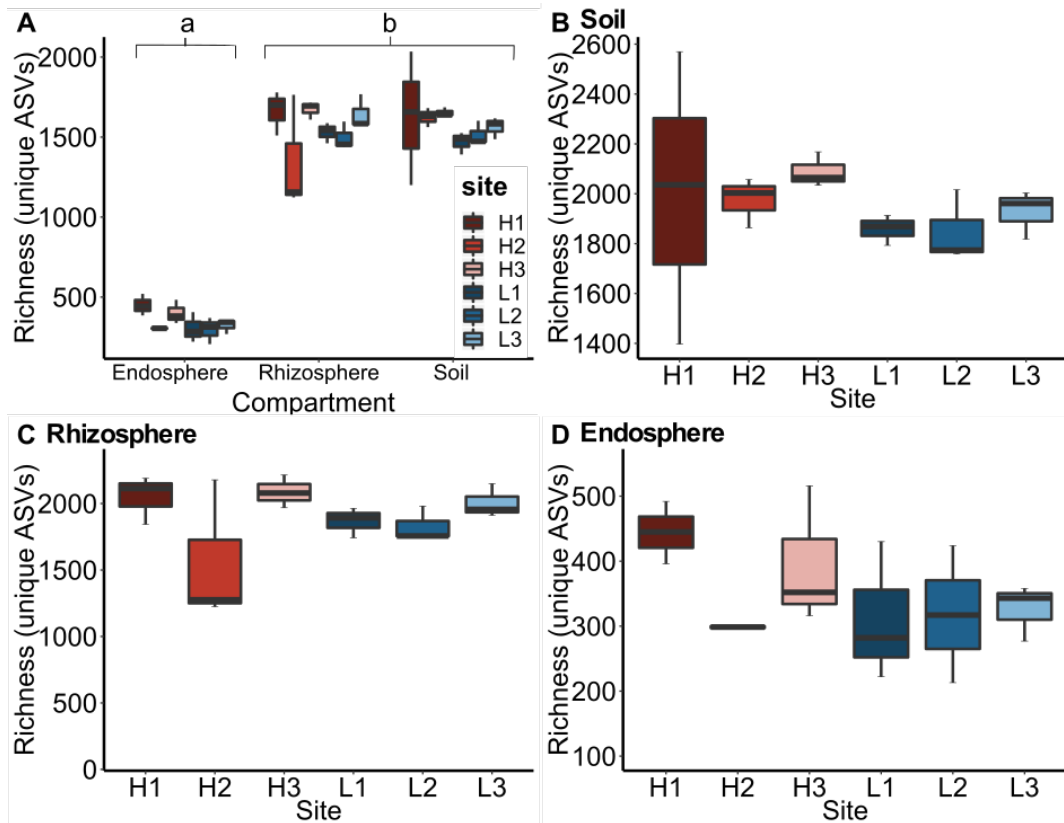

**S6.** Shannon diversity index of the Amplicon Sequence Variants (ASVs) comparing communities (A) and in each community separately: bulk soil (B), rhizosphere (C) and endosphere (D) in each sampling site. Sites H1-H3 are located at salt marsh high elevation and L1-L3 at low elevation. Letters denotes significant differences after a pairwise comparison of the least square means ( $p < 0.001$ , Tukey adjustment).

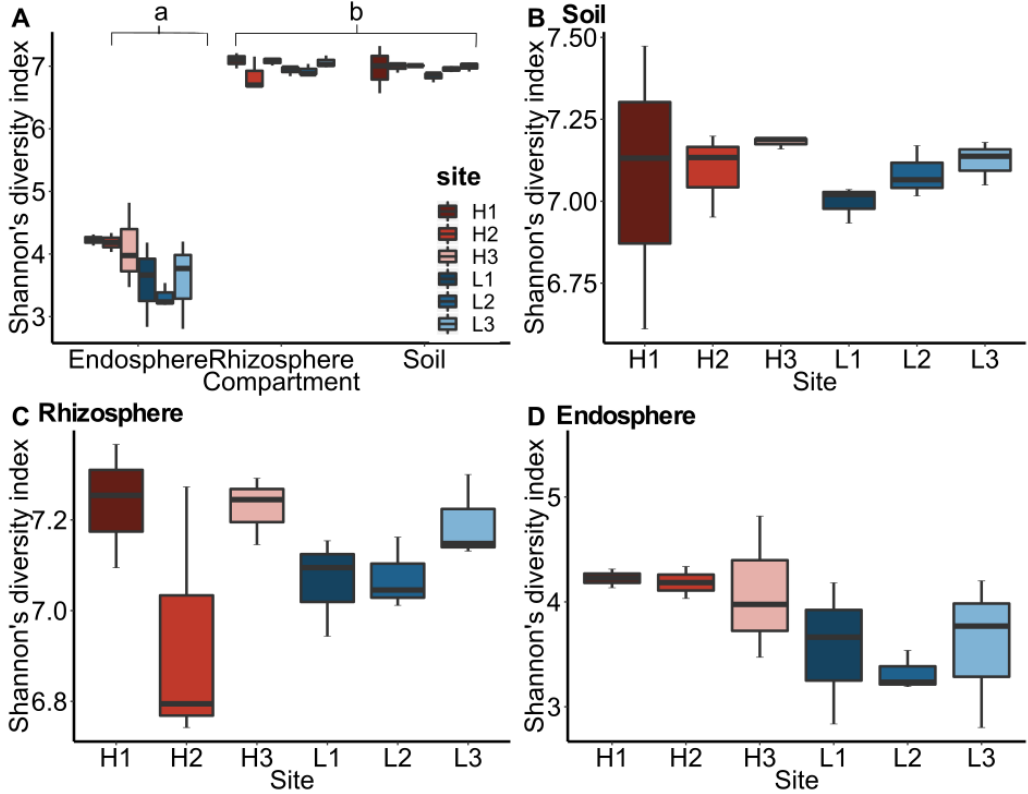

**S7.** Phylogenetic diversity index of the Amplicon Sequence Variants (ASVs) comparing communities (A) and in each community separately: bulk soil (B), rhizosphere (C) and endosphere (D) in each sampling site. Sites H1-H3 are located at salt marsh high elevation and L1-L3 at low elevation. In panel A and B, letters denote significant differences after a pairwise comparison of the least square means ( $p < 0.001$ , Tukey adjustment), degrees of freedom method Kenward-Roger.

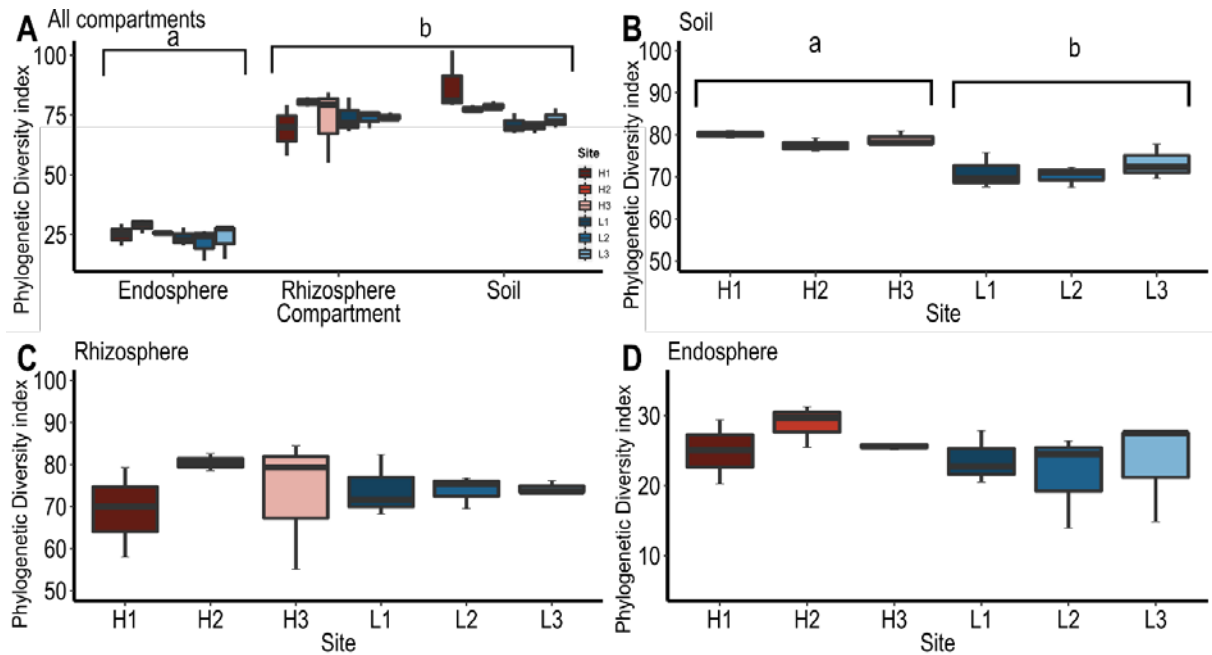

**S8.** Effect of elevation on soil, rhizosphere and endosphere bacterial community composition. Principal coordinate analysis based on unweighted Unifrac and Bray-Curtis dissimilarity distances of the bacterial community inhabit all type of communities i.e. endosphere, rhizosphere and soil as indicated at the top of each plot. Percentage of community variance explained by each axis is indicated in parentheses and summary of the permutational multivariate analysis of variance (PERMANOVA, 999 permutations) testing the effect of elevation, type of sample and stage of succession are reported in the table below the plots.

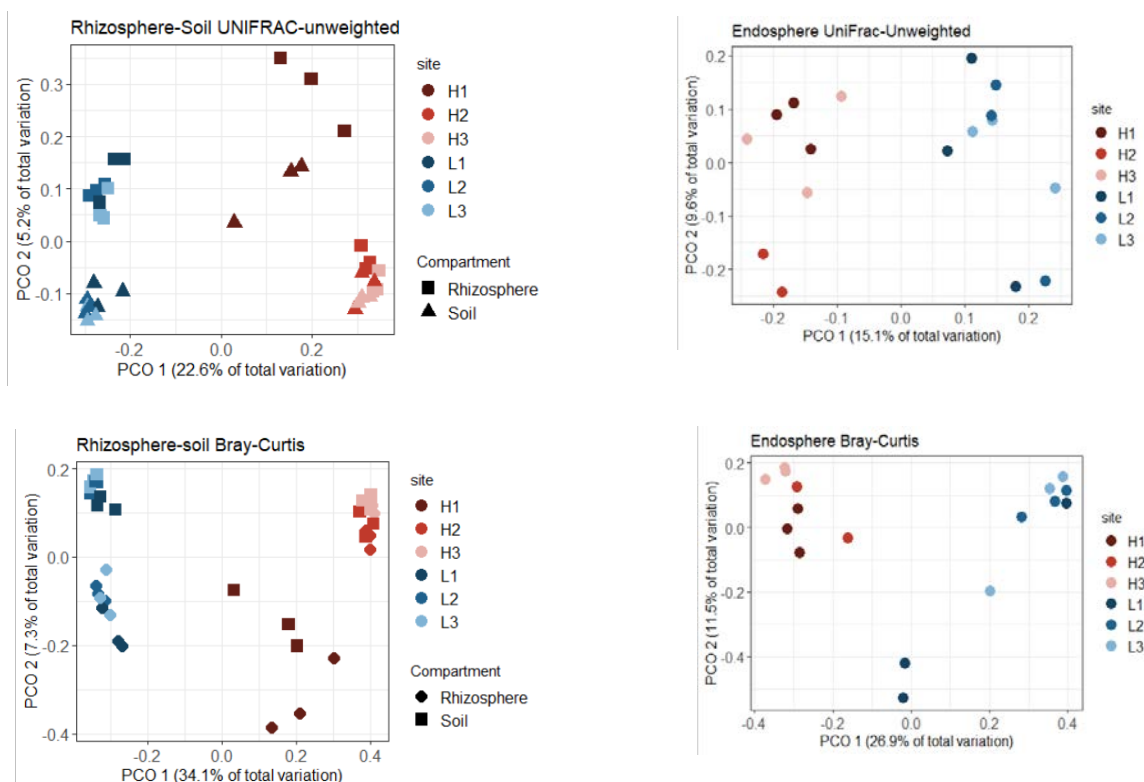

| Type of community    | Distance matrix    | Effect tested       | strata              | Pseudo-F | Df | R <sup>2</sup> | Significance | Significance dispersion of data |
|----------------------|--------------------|---------------------|---------------------|----------|----|----------------|--------------|---------------------------------|
|                      |                    |                     |                     |          |    |                | (p value)    | (p value)                       |
| Soil and rhizosphere | UniFrac unweighted | Elevation           | Community           | 12.41    | 1  | 0.267          | 0.001        | 0.002                           |
|                      |                    | Community           | site                | 1.78     | 1  | 0.049          | 0.001        | 0.224                           |
|                      |                    | Stage of succession | Community:Elevation | 6.24     | 2  | 0.275          | 0.001        | 0.001                           |
| Endosphere           | UniFrac unweighted | Elevation           | -                   | 2.28     | 1  | 0.132          | 0.001        | 0.411                           |
|                      |                    | Stage of succession | Elevation           | 1.55     | 2  | 0.181          | 0.035        | 0.003                           |
| Soil and rhizosphere | Bray Curtis        | Elevation           | Community           | 16.26    | 1  | 0.323          | 0.001        | 0.001                           |
|                      |                    | Community           | site                | 2.03     | 1  | 0.056          | 0.001        | 0.098                           |
|                      |                    | Stage of succession | Community:Elevation | 8.35     | 2  | 0.336          | 0.001        | 0.003                           |
| Endosphere           | Bray Curtis        | Elevation           | -                   | 4.76     | 1  | 0.241          | 0.001        | 0.383                           |
|                      |                    | Stage of succession | Elevation           | 2.82     | 2  | 0.287          | 0.017        | 0.314                           |



**S9.** Principal component analysis (PCA) showing the variation among sites in terms of soil physicochemical parameters (A) and plant traits and environmental factors (B). Symbol color indicate sites, symbols in red shades are found at high elevation and blue shade at low elevation. Symbol shape depicts the age of successional stage. Arrows and their lengths indicate direction and strength of the environmental variables.

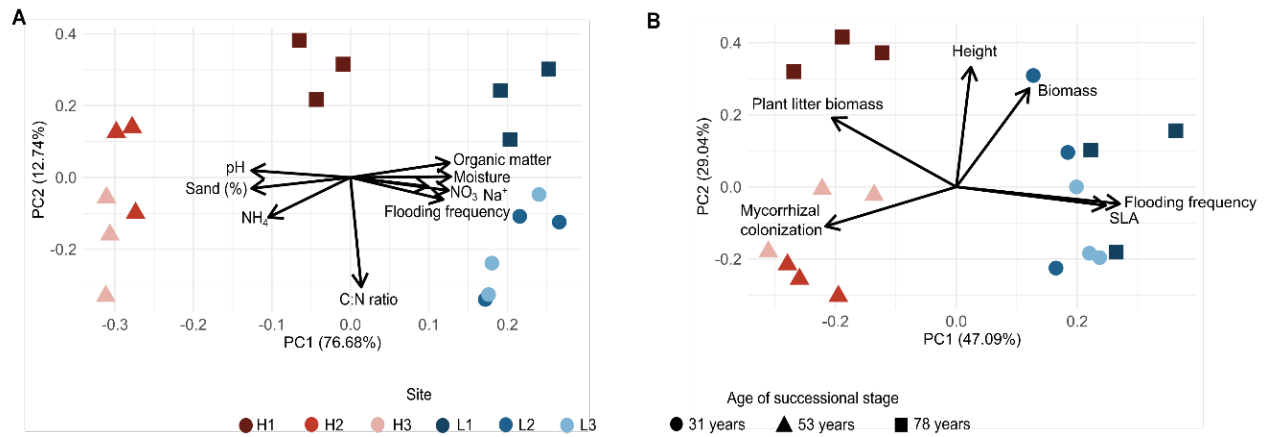

**S10.** Potential functional differences among elevations in each type of community. Summary of the aligned rank transform for non-parametric factorial with stage of succession as random factor analysis is showed. Values of  $p < 0.05$  were considered significant.

| Community   | Potential function | F     | df | p-value |    | Higher abundance in: |     |
|-------------|--------------------|-------|----|---------|----|----------------------|-----|
| Endosphere  | Cellulolysis       | 0.02  | 1  | 0.908   | NS |                      |     |
| Rhizosphere |                    | 6.61  | 1  | 0.103   | NS |                      |     |
| Soil        |                    | 7.16  | 1  | 0.058   | NS |                      |     |
| Endosphere  | Chitinolysis       | 0.94  | 1  | 0.421   | NS |                      |     |
| Rhizosphere |                    | 0.54  | 1  | 0.529   | NS |                      |     |
| Soil        |                    | 0.17  | 1  | 0.717   | NS |                      |     |
| Endosphere  | Fermentation       | 5.79  | 1  | 0.117   | NS |                      |     |
| Rhizosphere |                    | 5.79  | 1  | 0.117   | NS |                      |     |
| Soil        |                    | 0.16  | 1  | 0.721   | NS |                      |     |
| Endosphere  | Nitrification      | 0.02  | 1  | 0.905   | NS |                      |     |
| Rhizosphere |                    | 7.16  | 1  | 0.058   | NS |                      |     |
| Soil        |                    | 6.10  | 1  | 0.119   | NS |                      |     |
| Endosphere  | Nitrogen fixation  | 8.06  | 1  | 0.048   | *  | High                 |     |
| Rhizosphere |                    | 7.16  | 1  | 0.058   | NS |                      |     |
| Soil        |                    | 5.79  | 1  | 0.117   | NS |                      |     |
| Endosphere  | Ureolysis          | 5.79  | 1  | 0.117   | NS |                      |     |
| Rhizosphere |                    | 7.16  | 1  | 0.058   | NS |                      |     |
| Soil        |                    | 5.79  | 1  | 0.117   | NS |                      |     |
| Endosphere  | Xylanolysis        | t=-1  | 8  | 0.347   | NS |                      |     |
| Rhizosphere |                    | 15.54 | 1  | 0.018   | *  |                      | Low |
| Soil        |                    | 0.73  | 1  | 0.469   | NS |                      |     |
| Endosphere  | Ligninolysis       | 0.00  | 1  | 1.000   | NS |                      |     |
| Rhizosphere |                    | 1.98  | 1  | 0.279   | NS |                      |     |
| Soil        |                    | 1.58  | 1  | 0.317   | NS |                      |     |

**S11.** Barplots showing relative abundance of the potential bacterial functions with a tendency to be higher in high or low elevation sites.

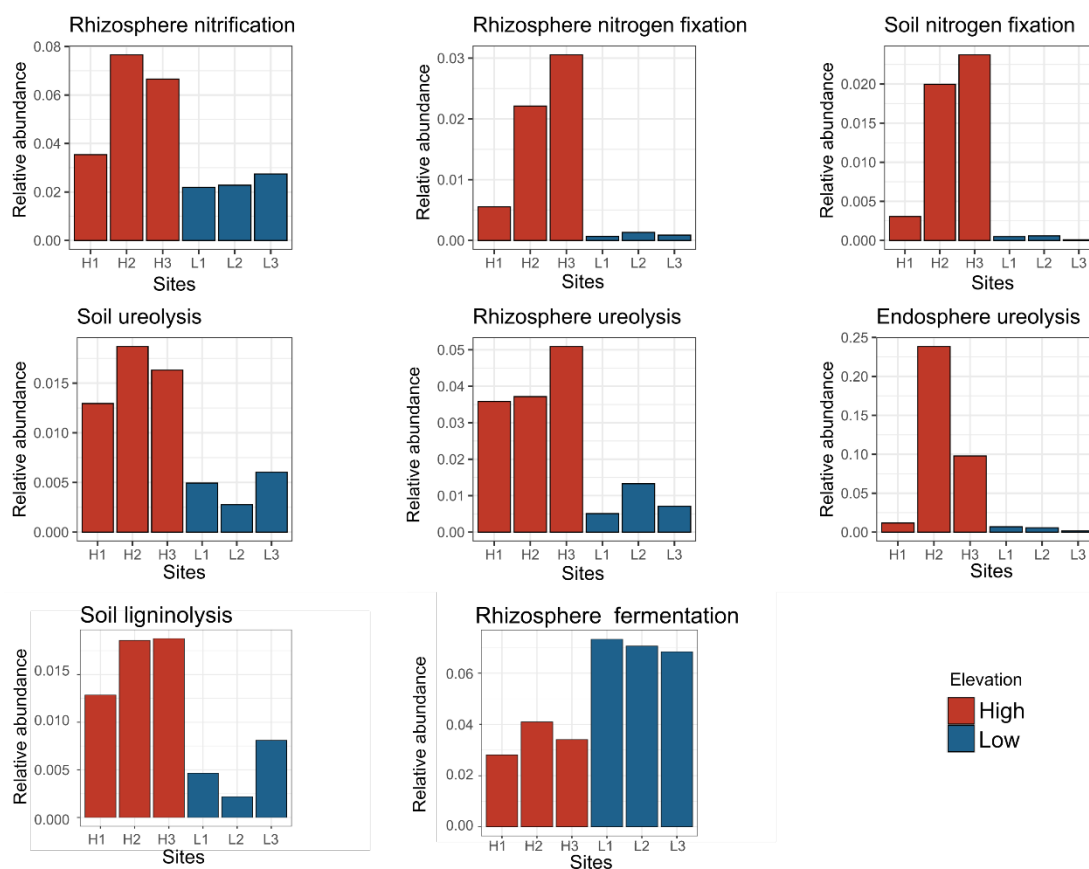

### Literature cited

- [1] B. Schulte, B.G. Hopkins, Estimation of soil organic matter by weight-loss-on-ignition, in: F.R. Magdoff (Ed.), Soil Org. Matter Anal. Interpret., SSSA Spec. Publ., WI, USA, 1996: pp. 349–359.
- [2] D.R. Keeny, D.W. Nelson, Nitrogen - inorganic forms, in: A.L. Page, R.H. Miller, D.R. Keeny (Eds.), Methods Soil Anal., ASA-SSSA, Madison, Wisconsin, USA, 1982: pp. 643–698.
